# Supplementary material for: Evaluation of In Vitro and In Vivo Antiviral Activities of Vitamin D for SARS-CoV-2 and Variants
Source: MDPI journal article supplement (doi:10.3390/pharmaceutics15030925), 2023-03-12
Supplement: s1 [file s1]

## Supplementary Materials: Evaluation of In Vitro and In Vivo Antiviral Activities of Vitamin D for SARS-CoV-2 and Variants

Chee-Keng Mok , Yan Ling Ng, Bintou Ahmadou Ahidjo , Zhen Qin Aw, Huixin Chen, Yi Hao Wong , Regina Ching Hua Lee, Marcus Wing Choy Loe, Jing Liu, Kai Sen Tan, Parveen Kaur, De Yun Wang , Erwei Hao, Xiaotao Hou, Yong Wah Tan, Jiagang Deng and Justin Jang Hann Chu

**Figure S1. Full length western blots of SARS-CoV-2 spike and VDR proteins in Vero E6 cells.**

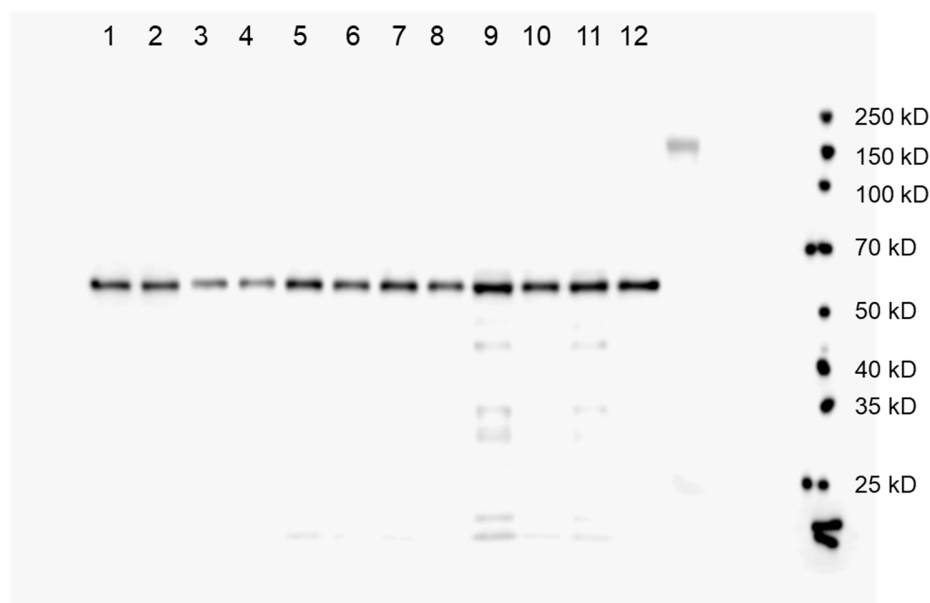

**$\alpha$ -vitamin D receptor** (1:3000 in 5% BSA)  
Proteintech  $\alpha$ -Vitamin D Receptor (Cat No.: 16922-1-AP)

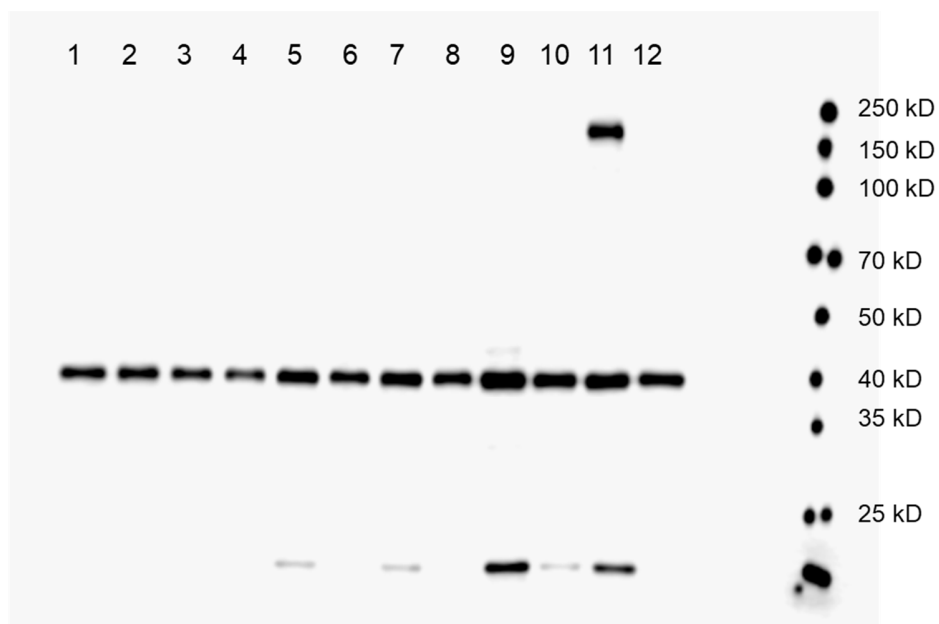

**$\alpha$ -beta actin** (1:10000 in 5% BSA)

**$\alpha$ -SARS-CoV-2 S1 RBD** (1:1500 in 5% BSA)  
Sinobiological  $\alpha$ -SARS-CoV-2 S1/RBD (Cat No.: 40592-T62)

**Figure S2. Physiological scoring of K18-hACE2 mice treated by calcitriol.**

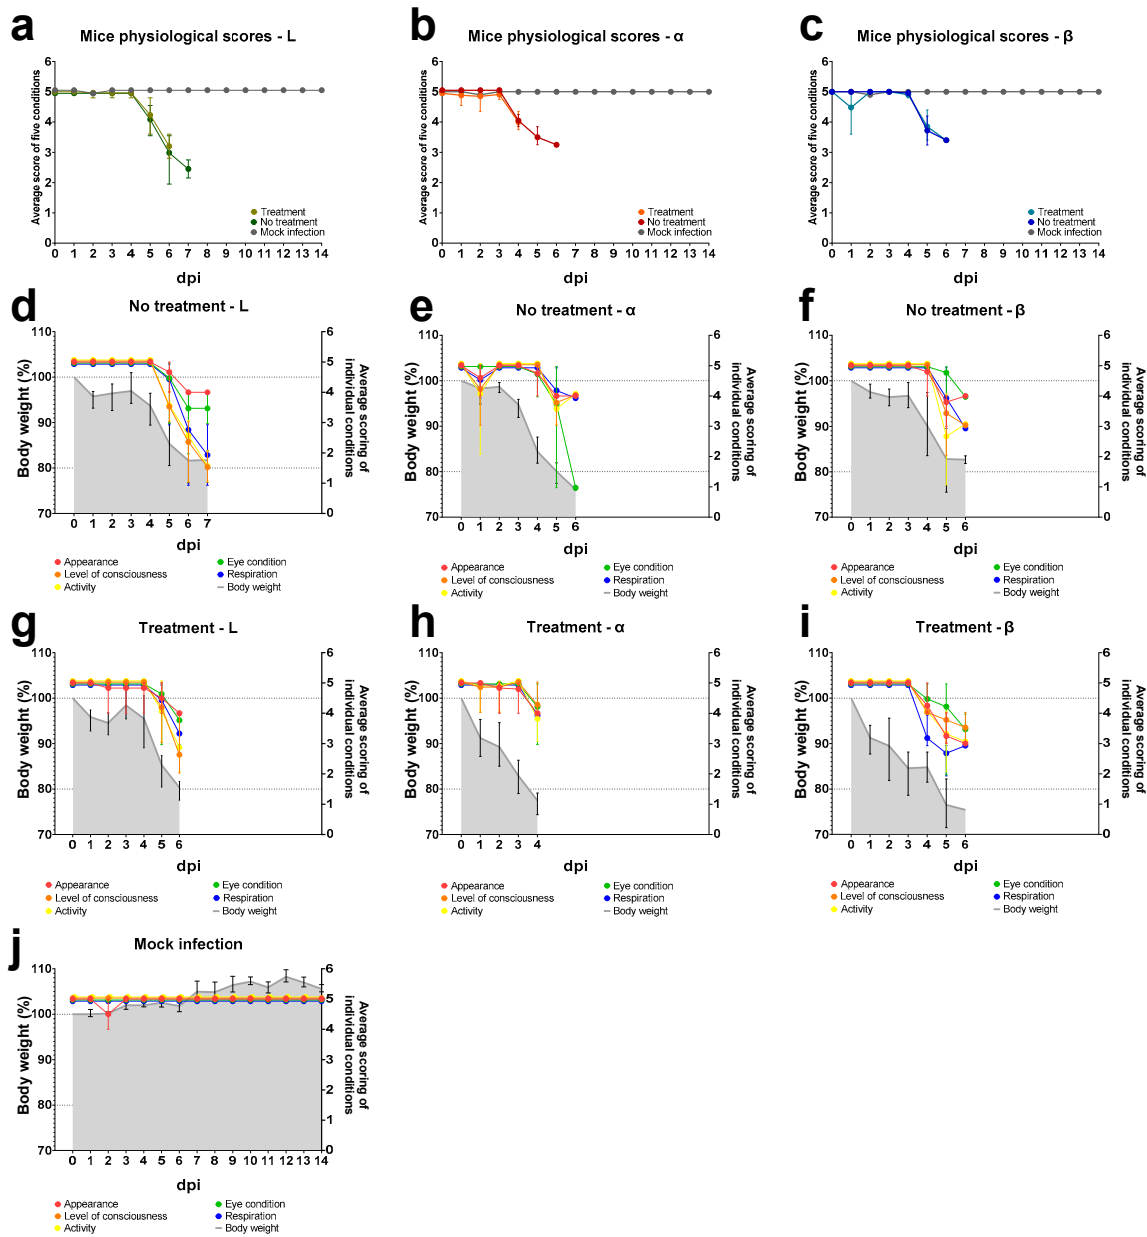

Average score of the five physiological conditions between treatment and no treatment groups over the course of the infection for all three variant infected mice (**A**, **B**, **C**). Scoring is based on the average of five physiological criteria: appearance, level of consciousness, activity, eye condition, and respiration, and scored from 1 (worst) to 5 (normal) of each group. Breakdown of individual physiological criteria score against average body weight loss of each treatment group by variants (**D-J**).

**Figure S3. Lung biopsy of K18-hACE2 mice treated by calcitriol.**

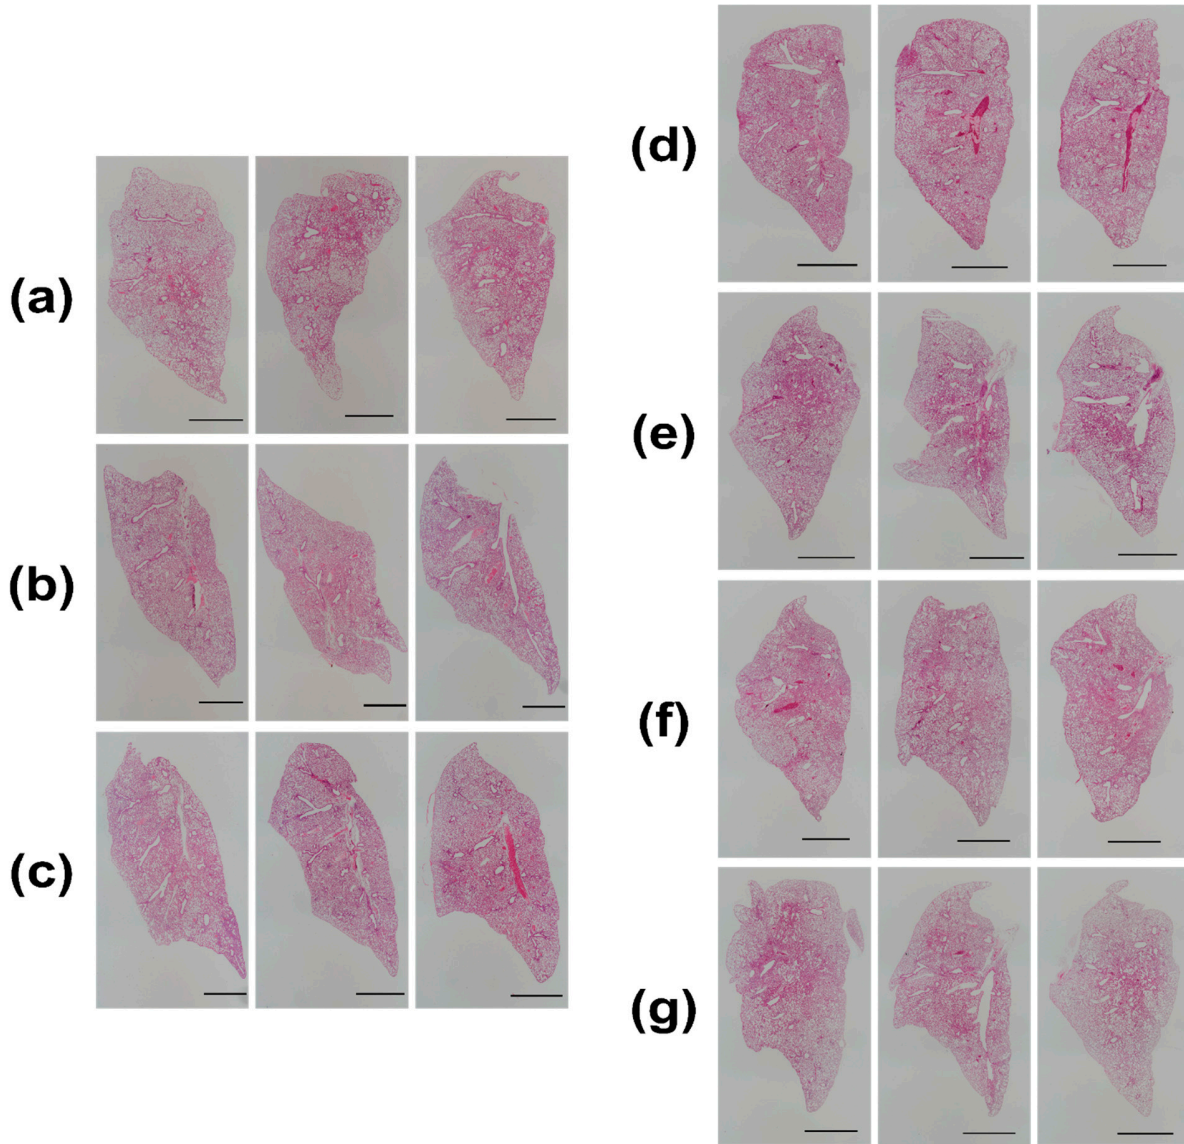

H&E staining of 4dpi mice's lung biopsy from (A) mock treatment group; no treatment group infected with the (B) wild-type, (D) alpha, (F) beta variants of SARS-CoV-2; and treatment group infected with the (C) wild-type, (E) alpha, (G) beta variants of SARS-CoV-2. (Magnification: 5x, scale bars: 2000 $\mu$ m)



**Figure S4. *In vivo* calcitriol treatment by oral gavage.**

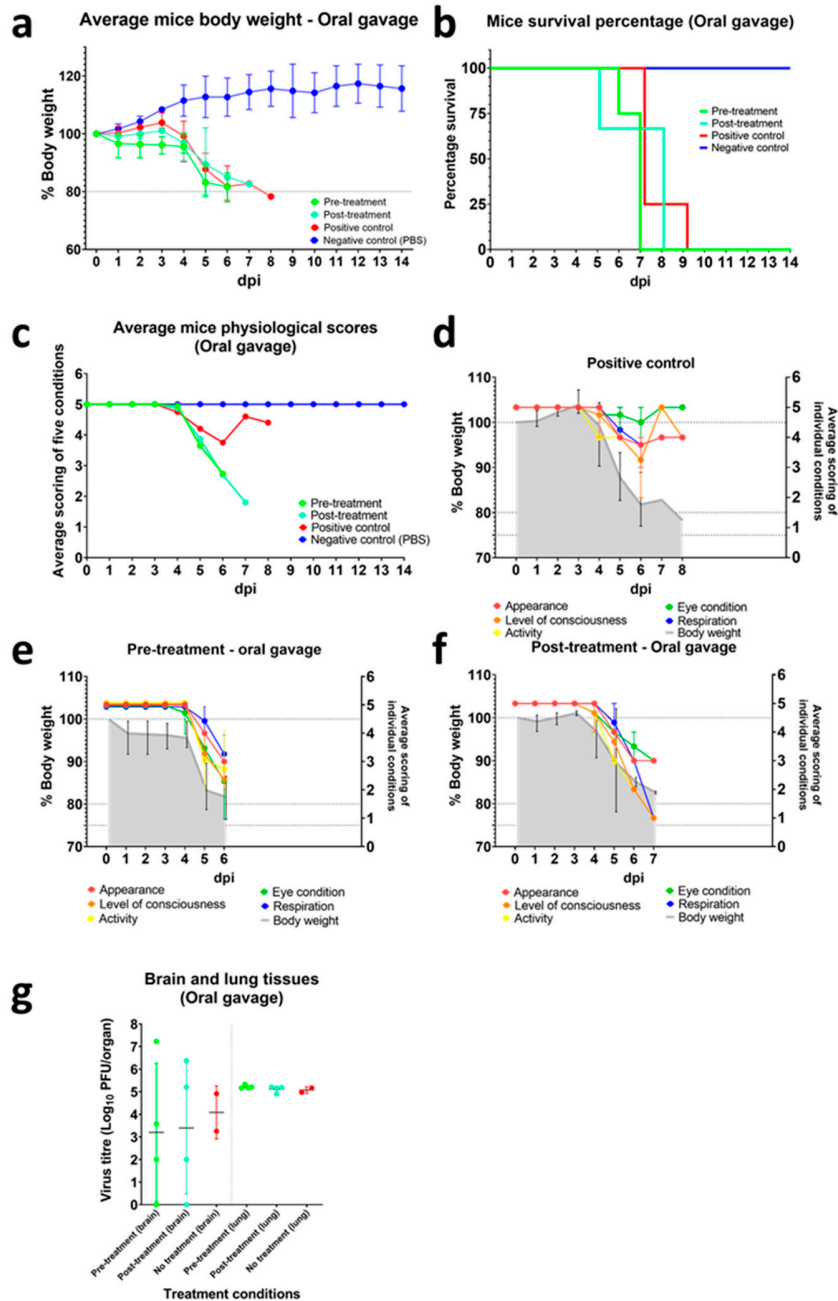

Low dose of calcitriol (0.5 ug/kg) have been given by oral gavage to pre-treatment and post-treatment groups. Positive and negative controls were no treatment and given PBS. Positive, pre- and post-treatment groups were infected by wild-type SARS-CoV-2 ( $10^3$  PFU) after 7-days of pre-treatment. (A) Body weight loss, (B) survival rate, (C) average of physiological scoring, (D) individual physiological criteria of positive control, (E) pre-treatment, and (F) post-treatment groups were recorded. (G) Viral load of lung and brain after 4 dpi were examined by plaque assay.

**Table S1. List of primary hits identified from the primary screen performed using an FDA-approved library.**

| Compound/Treatment  | Image                                                                              | Compound/Treatment | Image                                                                                |
|---------------------|------------------------------------------------------------------------------------|--------------------|--------------------------------------------------------------------------------------|
| Uninfected          | 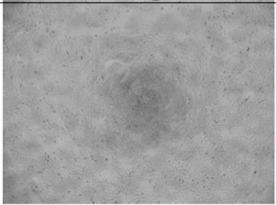  | 0.1% DMSO          |   |
| Remdesivir          |   |                    |                                                                                      |
| Ramelteon (TAK-375) |   | Telmisartan        |   |
| Masitinib           |  | Rifampin           |  |

| Compound/Treatment     | Image                                                                              | Compound/Treatment       | Image                                                                                |
|------------------------|------------------------------------------------------------------------------------|--------------------------|--------------------------------------------------------------------------------------|
| MDV3100 (Enzalutamide) | 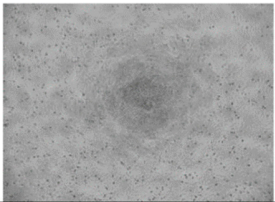  | Amorolfine Hydrochloride |   |
| Everolimus             |   | Manidipine               |   |
| Fulvestrant (Faslodex) |   | Clomifene Citrate        |   |
| Imatinib Mesylate      |  | Econazole Nitrate        |  |

| Compound/Treatment      | Image                                                                              | Compound/Treatment | Image                                                                                |
|-------------------------|------------------------------------------------------------------------------------|--------------------|--------------------------------------------------------------------------------------|
| Mianserin Hydrochloride | 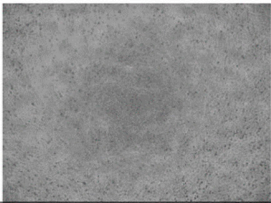  | Phenacetin         |   |
| Trilostane              |   | Lonidamine         |   |
| Mercaptopurine          |   | Idebenone          |   |
| Artemisinin             |  | Hygromycin B       |  |

| Compound/Treatment         | Image                                                                              | Compound/Treatment        | Image                                                                                |
|----------------------------|------------------------------------------------------------------------------------|---------------------------|--------------------------------------------------------------------------------------|
| Cetirizine Dihydrochloride | 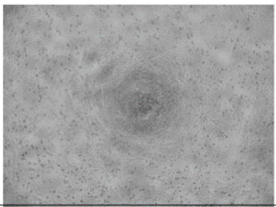  | Alverine Citrate          |   |
| Loratadine                 |   | Doxycycline Hydrochloride |   |
| Ketoconazole               |   | Creatinine                |   |
| Lopinavir                  |  | Benztropine Mesylate      |  |



| Compound/Treatment         | Image                                                                              | Compound/Treatment              | Image                                                                                |
|----------------------------|------------------------------------------------------------------------------------|---------------------------------|--------------------------------------------------------------------------------------|
| Ranolazine Dihydrochloride | 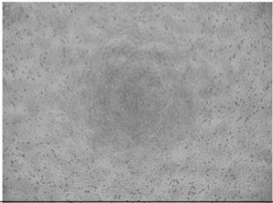  | Clinafloxacin                   |   |
| Tranilast                  |   | Altrenogest                     |   |
| Ofloxacin (Floxin)         |   | Avanafil                        |   |
| Erythromycin               |  | Trifluoperazine Dihydrochloride |  |

| Compound/Treatment         | Image                                                                              | Compound/Treatment       | Image                                                                                |
|----------------------------|------------------------------------------------------------------------------------|--------------------------|--------------------------------------------------------------------------------------|
| Moxifloxacin Hydrochloride | 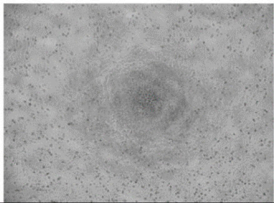  | Sertraline Hydrochloride |   |
| Calcitriol                 |   | Dexlansoprazole          |   |
| Telaprevir                 |   | Closetel Sodium          |   |
| Calcifediol                |  | Famprofazone             |  |

| Compound/Treatment | Image                                                                              | Compound/Treatment                        | Image                                                                                |
|--------------------|------------------------------------------------------------------------------------|-------------------------------------------|--------------------------------------------------------------------------------------|
| Cyclosporine       | 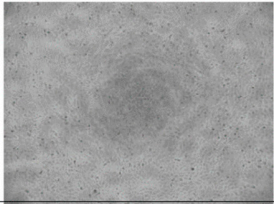  | Metaproterenol Sulfate<br>(Orciprenaline) |   |
| Telbivudine        |   | Ractopamine Hydrochloride                 |   |
| Nevirapine         |   | Terfenadine                               |   |
| Esomeprazole       |  | Thiostrepton                              |  |



| Compound/Treatment | Image                                                                             | Compound/Treatment           | Image                                                                               |
|--------------------|-----------------------------------------------------------------------------------|------------------------------|-------------------------------------------------------------------------------------|
| Progesterone       | 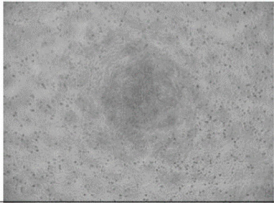 | Glafenine Hydrochloride      |  |
| Nimodipine         |  | Meclocycline Sulfosalicylate |  |

**Table S2. List of primary hits identified from the primary screen performed using an ACE2 inhibitors library.**

| Compound/Treatment | Image                                                                              | Compound/Treatment | Image                                                                                |
|--------------------|------------------------------------------------------------------------------------|--------------------|--------------------------------------------------------------------------------------|
| Uninfected         | 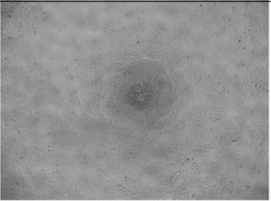  | 0.1% DMSO          |   |
| Remdesivir         |   |                    |                                                                                      |
|                    |                                                                                    |                    |                                                                                      |
| Citicoline         |   | Nuezhenide         |   |
| Cefpiramide Acid   |  | Tepotinib          |  |

| Compound/Treatment       | Image                                                                               | Compound/Treatment        | Image                                                                                 |
|--------------------------|-------------------------------------------------------------------------------------|---------------------------|---------------------------------------------------------------------------------------|
| Calcium Follinate        | 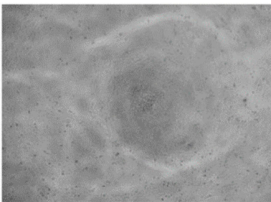   | Mulberroside A            |    |
| Dronedaron Hydrochloride |    | 4,5-Dicaffeoylquinic acid |    |
| Pravastatin Sodium       |    | Crocin I                  |    |
| Tenofovir Alafenamide    |   | PLX8394                   |   |
| Navitoclax               |  | Complanatoside            |  |

| Compound/Treatment        | Image                                                                               | Compound/Treatment             | Image                                                                                 |
|---------------------------|-------------------------------------------------------------------------------------|--------------------------------|---------------------------------------------------------------------------------------|
| Bimatoprost               | 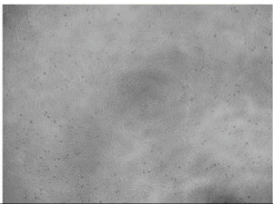   | 1,2-Dipalmitoyl-sn-glycerol    |    |
| Echinacoside              |    | rac-Glycerol 1-myristate       |    |
| CUDC101                   |    | Cefotiam Hexetil Hydrochloride |    |
| PHT427                    |   | Dabigatran Etxilate Mesylate   |   |
| Puromycin Dihydrochloride |  | Glycerol Tridecanoate          |  |

| Compound/Treatment | Image                                                                              | Compound/Treatment          | Image                                                                               |
|--------------------|------------------------------------------------------------------------------------|-----------------------------|-------------------------------------------------------------------------------------|
| UNC0638            | 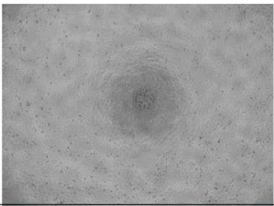  | ARV-825                     |  |
| Homoharringtonine  |   | Levobetaxolol Hydrochloride |  |
| Calpeptin          |   | Travoprost                  |  |
| Crocin II          |  |                             |                                                                                     |



**Table S3. List of primary hits identified from the primary screen performed using a flavonoid library.**

| Compound/Treatment | Image                                                                              | Compound/Treatment | Image                                                                                |
|--------------------|------------------------------------------------------------------------------------|--------------------|--------------------------------------------------------------------------------------|
| Uninfected         | 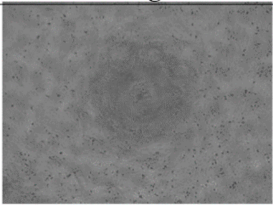  | 0.1% DMSO          |   |
| Remdesivir         |   |                    |                                                                                      |
| ST002047           |   | ST079547           |   |
| ST014848           |  | ST085666           |  |

|          |                                                                                     |          |                                                                                       |
|----------|-------------------------------------------------------------------------------------|----------|---------------------------------------------------------------------------------------|
| ST055995 | 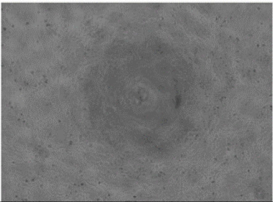   | ST076522 |    |
| ST056004 |    | ST083654 |    |
| ST056249 |    | ST081389 |    |
| ST056248 |   | ST076533 |   |
| ST057711 |  | ST095414 |  |

|          |                                                                                     |          |                                                                                       |
|----------|-------------------------------------------------------------------------------------|----------|---------------------------------------------------------------------------------------|
| ST058442 | 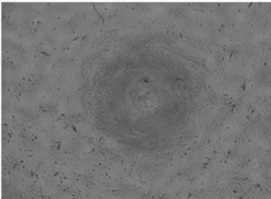   | ST097097 |    |
| ST057646 |    | ST094884 |    |
| ST059590 |    | ST095197 |    |
| ST069324 |   | ST095849 |   |
| ST075446 |  | ST097570 |  |



|          |                                                                                     |          |                                                                                       |
|----------|-------------------------------------------------------------------------------------|----------|---------------------------------------------------------------------------------------|
| ST076534 | 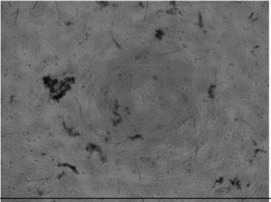   | ST020733 |    |
| ST079949 |    | ST074501 |    |
| ST083092 |    | ST074530 |    |
| ST083658 |   | ST077114 |   |
| ST077135 |  | ST077122 |  |
